# Supplementary material for: The biological impact of blood pressure-associated genetic variants in the natriuretic peptide receptor C gene on human vascular smooth muscle
Source: PubMed Central journal article supplement — Hum Mol Genet. 2017 Oct 10;27(1):199–210. doi: 10.1093/hmg/ddx375 (PMC5886068; doi:10.1093/hmg/ddx375), 2017-10-10
Supplement: ddx375_supplementary_materials.pdf [file ddx375_supplementary_materials.pdf]

**The biological impact of blood pressure associated genetic variants  
in the natriuretic peptide receptor C gene on human vascular smooth muscle**

Meixia Ren<sup>1,2,3</sup>, Fu Liang Ng<sup>1,2</sup>, Helen Warren<sup>1,2</sup>, Kate Witkowska<sup>1,2</sup>, Michael Baron<sup>4</sup>, Zhilong Jia<sup>1,5</sup> Claudia Cabrera<sup>1,2</sup>, Ruoxin Zhang<sup>1</sup>, Borbala Mifsud<sup>1</sup>, Patricia B. Munroe<sup>1,2</sup>, Qingzhong Xiao<sup>1</sup>, Andrea Townsend-Nicholson<sup>3</sup>, Adrian Hobbs<sup>1,2</sup>, Shu Ye<sup>6,7,8\*</sup>, and Mark Caulfield<sup>1,2\*</sup>.

<sup>1</sup>William Harvey Research Institute, Barts and The London School of Medicine and Dentistry, Queen Mary University of London, London, UK.

<sup>2</sup>National Institute for Health Research Cardiovascular Biomedical Research Unit at Barts, Barts Heart Centre, Queen Mary University of London, London, UK.

<sup>3</sup>Department of Geriatric Medicine, Fujian Provincial Hospital, Fujian Key Laboratory of Geriatrics, Fujian Medical University, Fuzhou, China.

<sup>4</sup>Structural & Molecular Biology, University College London, London, UK.

<sup>5</sup>Core Laboratory of Translational Medicine, Chinese PLA General Hospital, Beijing, China.

<sup>6</sup>Department of Cardiovascular Sciences, University of Leicester, Leicester, UK.

<sup>7</sup>NIHR Leicester Biomedical Research Centre, Leicester, UK.

<sup>8</sup>Shantou University Medical College, Shantou, China

\*share senior authorship and as corresponding authors

Correspondence to:

Professor Mark Caulfield, Heart Centre, William Harvey Research Institute, Charterhouse Square, London EC1M 6BQ UK, Tel: +44(0)2078823402, Email: [m.j.caulfield@qmul.ac.uk](mailto:m.j.caulfield@qmul.ac.uk);  
or Professor Shu Ye, Department of Cardiovascular Sciences, Glenfield General Hospital, Groby Road, Leicester LE3 9QP, UK, Tel: +44(0)1162044754, Email: [sy127@leceister.ac.uk](mailto:sy127@leceister.ac.uk);

**Supplementary Figures.**

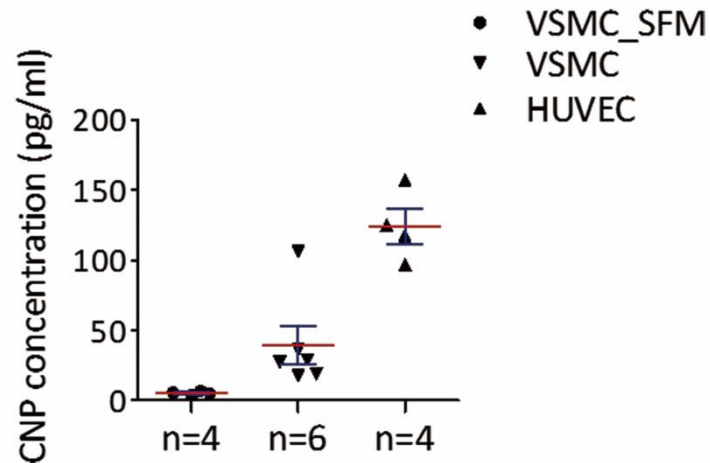

**Supplementary Fig. 1. Detection of natriuretic peptides (CNP) in cell growth media.**

‘VSMC\_SFM’ indicates VSMC cultured with serum-free medium. Media from VSMC and EC (as a positive control) cultures was collected and subjected to Enzyme Immunoassay (EIA) for CNP evaluation. CNP was detected in both VSMC and EC culture media. Values shown in column charts are Mean  $\pm$  SEM.

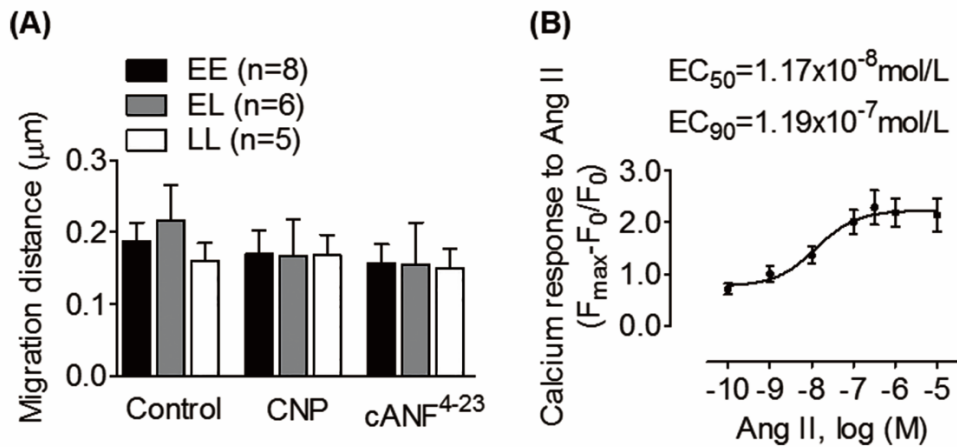

**Supplementary Fig. 2. Effect of NPR3 BP-associated variants on human VSMCs migration and Ang II concentration-response curves.**

‘E’ indicates the BP-elevating allele, ‘L’ denotes the BP-lowering allele. Values are shown as Mean  $\pm$  SEM of different measurements. **(A)** VSMCs were incubated in the absence or presence of C-type natriuretic peptide (CNP) (100nmol/L), the NPR-C specific agonist  $\text{cANF}^{4-23}$  (100nmol/L), No difference in migration rate was observed among genotypes in untreated or treated VSMCs. **(B)** VSMCs were incubated with loading dye calcium 6 and stimulated by a range of angiotensin II concentrations. Data came from three independent experiments.

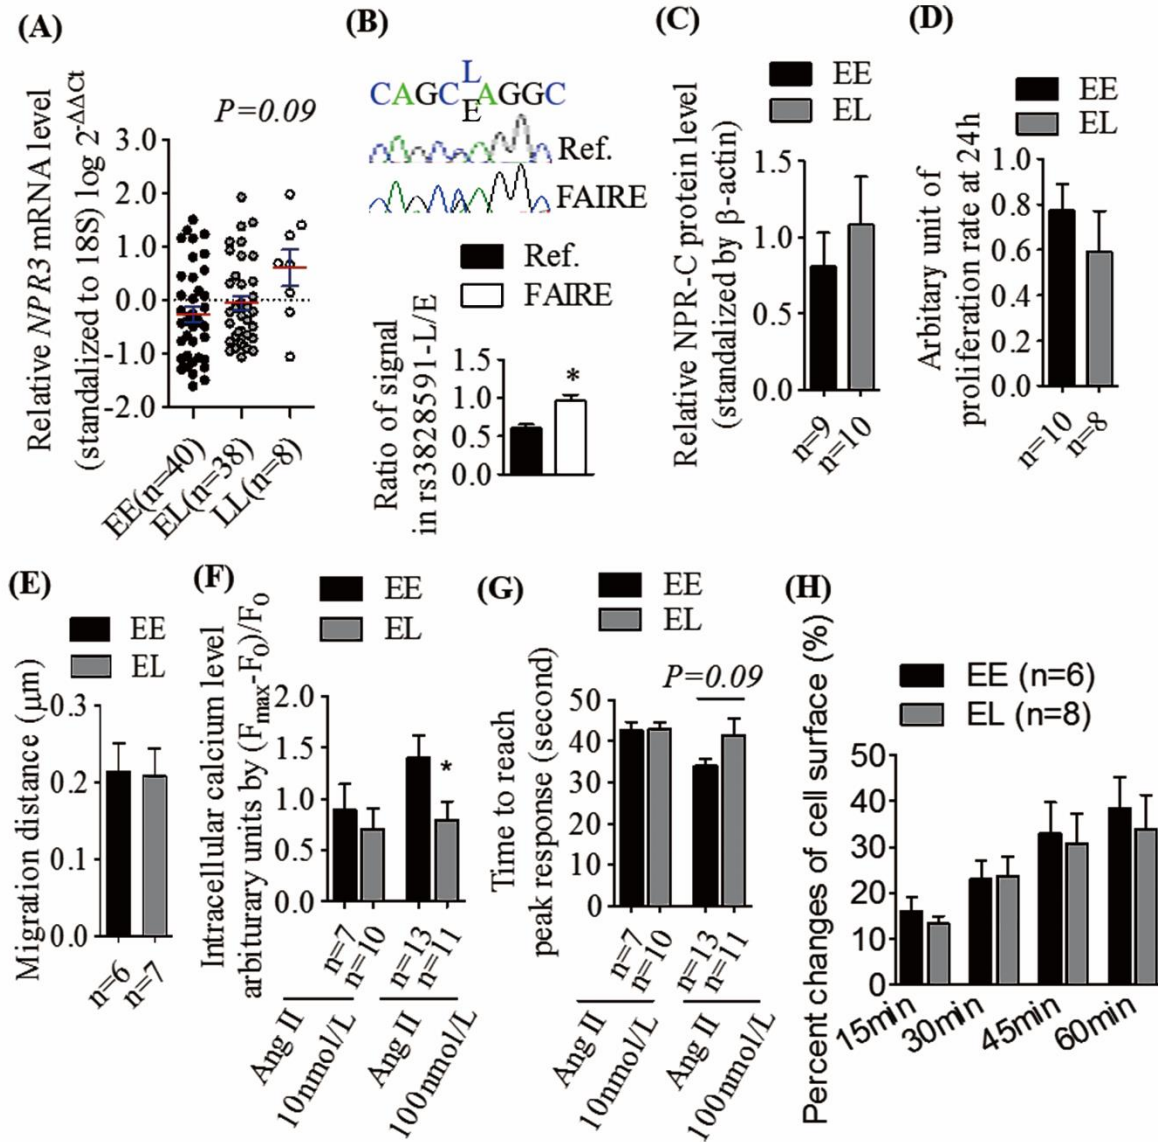

**Supplementary Fig. 3. Effect of BP-associated variants in rs1421811 LD block on VSMCs *NPR3* expression, and cell activities.**

(A-H) ‘E’ indicates the BP-elevating allele, ‘L’ denotes the BP-lowering allele. Values are shown as Mean  $\pm$  SEM of different measurements. (A) Relative mRNA levels of *NPR3* in VSMCs, determined by qRT-PCR and standardized against the reference gene 18S. (B) FAIRE followed by allelic imbalance assay and Sanger sequencing. Upper: Representative images showing different peak heights of the E and L alleles of intronic SNP rs3828591 ( $r^2=1.0$  with lead SNP rs1421811) in chromatograms derived from reference (Ref.) DNA and FAIRE DNA,

n=5 heterozygous samples \* $P < 0.05$ . (C) Western blot analysis of NPR-C protein in ECs with beta-actin as a loading control. (D, E) No genetic difference was detected in either cell proliferation or migration. (F, G) VSMCs were incubated with Ang II (10nmol/L or 100nmol/L). Difference between genotypes in intracellular calcium flux changes. \* $P < 0.05$  (H) VSMC cell contraction under stimulation of 100nmol/L Ang II.

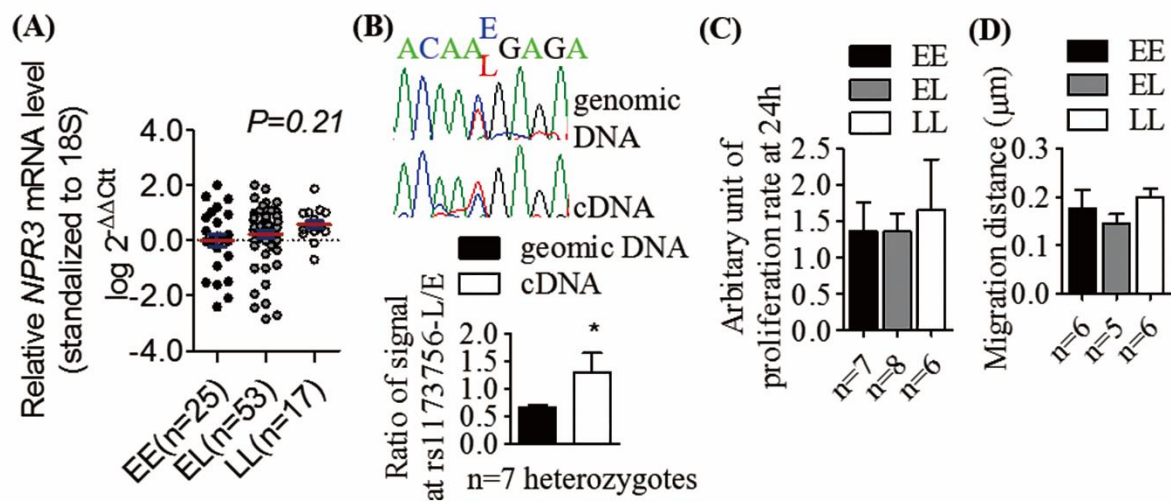

**Supplementary Fig. 4. No association between BP-associated variants in rs1173771 LD block with ECs cell phenotypes.**

‘E’ stands for the BP-elevating allele, ‘L’ denotes the BP-lowering allele. Values are shown as Mean  $\pm$  SEM of different measurements. (A) Relative mRNA levels of *NPR3* in ECs, determined by quantitative reverse-transcription polymerase chain reaction (qRT-PCR) and standardized against the reference gene 18S. (B) The relative peak heights of two alleles of the 3’ UTR SNP rs1173756 ( $r^2=0.78$  with rs1173771) in sequencing chromatograms from genomic DNA and complementary DNA (cDNA) of ECs. \* $P < 0.05$  (C, D) ECs proliferation and migration were measured.

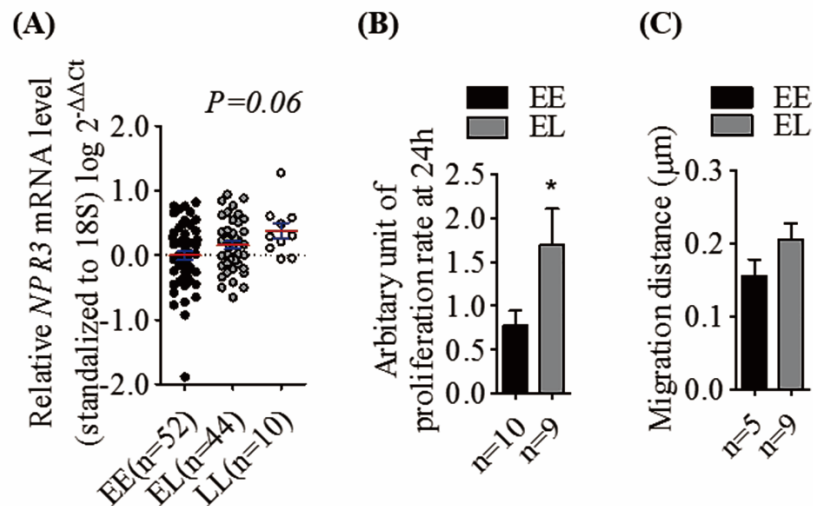

**Supplementary Fig. 5. Effect of BP-associated variants in rs1421811 LD block on ECs *NPR3* expression, cell proliferation, migration.**

‘E’ stands for the BP-elevating allele, ‘L’ denotes the BP-lowering allele. Values are shown as Mean  $\pm$  SEM of different measurements. (A) *NPR3* mRNA detection by q RT-PCR in ECs for rs1421811 LD variants. (B, C) Endothelial cell proliferation and migration were measured, \* $P < 0.05$ .

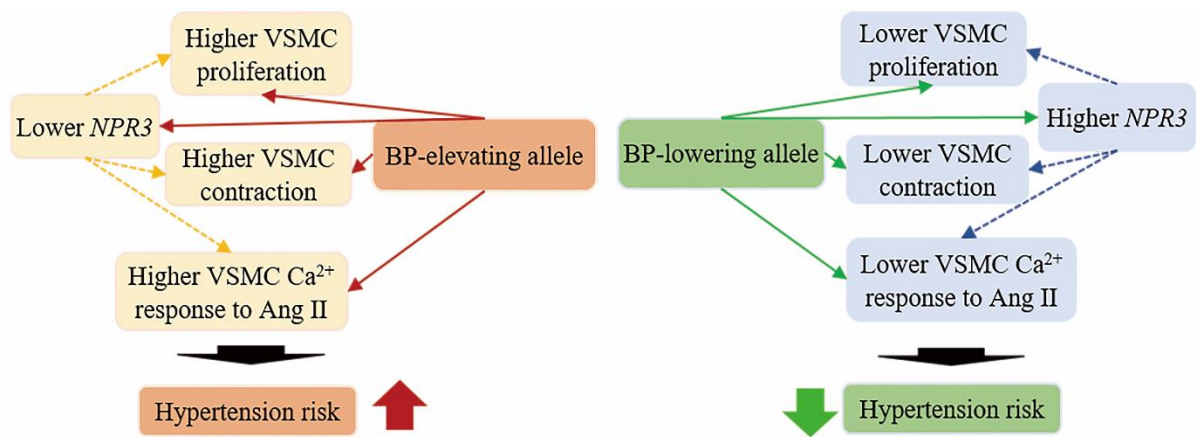

**Supplementary Fig. 6. Proposed model to show the systemic mechanism between NPR3 risk variants and hypertension risk.**

The BP-elevating allele results in a lower *NPR3* expression and upregulates human vascular smooth muscle cell proliferation, intracellular calcium changes, and cell contraction in response to angiotensin II which could lead to higher risk for the development of hypertension.

Supplementary Tables.

Supplementary Table 1. Association between *NPR3* variants with blood pressure traits (DBP, PP) in UK Biobank cohort.

|                | Candidate SNPs | Positions on Chr 5 (bp) | EA | AA | EAF  | Phenotypes   | DBP Effect (mmHg) | <i>P</i> -value (DBP)  | PP Effect (mmHg) | <i>P</i> -value (PP)   |
|----------------|----------------|-------------------------|----|----|------|--------------|-------------------|------------------------|------------------|------------------------|
| <b>Block 1</b> | rs1173727      | 32830521                | C  | T  | 0.60 | SBP, DBP, PP | 0.34 (0.04)       | 1.64×10 <sup>-17</sup> | 0.41 (0.05)      | 2.19×10 <sup>-17</sup> |
|                | rs1173743      | 32775047                | T  | G  | 0.52 | SBP, PP      | ns                |                        | 0.26 (0.05)      | 1.88×10 <sup>-8</sup>  |
|                | rs1173747      | 32782152                | A  | C  | 0.53 | SBP, DBP, PP | 0.23 (0.04)       | 8.07×10 <sup>-9</sup>  | 0.29 (0.05)      | 2.00×10 <sup>-9</sup>  |
|                | rs1173756      | 32789852                | C  | T  | 0.53 | SBP, DBP, PP | 0.22 (0.04)       | 3.54×10 <sup>-8</sup>  | 0.50 (0.05)      | 4.90×10 <sup>-9</sup>  |
|                | rs1173771      | 32815028                | C  | T  | 0.60 | SBP, DBP, PP | 0.32 (0.04)       | 5.06×10 <sup>-16</sup> | 0.41 (0.05)      | 2.03×10 <sup>-17</sup> |
|                | rs7733331      | 32828846                | C  | T  | 0.60 | SBP, DBP, PP | 0.32 (0.04)       | 4.71×10 <sup>-17</sup> | 0.42 (0.05)      | 1.40×10 <sup>-17</sup> |
| <b>Block 2</b> | rs1421811      | 32714270                | C  | G  | 0.39 | SBP, DBP, PP | -0.26 (0.04)      | 2.15×10 <sup>-10</sup> | -0.43 (0.05)     | 3.34×10 <sup>-18</sup> |
|                | rs3762988      | 32709653                | C  | T  | 0.39 | SBP, DBP, PP | -0.25 (0.04)      | 4.33×10 <sup>-10</sup> | -0.41 (0.05)     | 6.83×10 <sup>-17</sup> |
|                | rs3828591      | 32713108                | G  | C  | 0.39 | SBP, DBP, PP | -0.25 (0.04)      | 4.53×10 <sup>-10</sup> | -0.43 (0.05)     | 4.15×10 <sup>-18</sup> |

The genetic position is based on Build 37 of the reference genome.  $P < 5 \times 10^{-8}$  was used as a threshold to determine the association with BP traits.

The effect is presented as unit change (mmHg) with standard error (SE) in DBP, PP per copy of effect allele. Chr, chromosome; EA, effect allele;

AA, alternative allele; EAF, effect allele frequency. DBP, diastolic blood pressure; PP, pulse pressure. ns, not significant ( $P > 5 \times 10^{-8}$ ).



**Supplementary Table 2. Candidate SNPs at *NPR3* locus and their bioinformatics predication annotations.**

|                | Candidate SNPs | Positions on Chr 5 (bp) | SNP annotation       | LD with lead SNP (CEU/CHBJPT/YRI) | ENCODE+ROADMAP                                        | MotifDb/MotifbreakR                   | Gene-regulation           | Matinspector               | Published evidence               |
|----------------|----------------|-------------------------|----------------------|-----------------------------------|-------------------------------------------------------|---------------------------------------|---------------------------|----------------------------|----------------------------------|
| <b>Block 1</b> | rs1173771      | 32815028                | Lead SNP/ intergenic | -                                 | H3K27ac; H3K27M3; H3K4M1;                             | HNF1_3;                               | NA                        | NA                         | ICBP GWAS <sup>1</sup>           |
|                | rs1173747      | 32782152                | intronic             | 0.78/1.00/0.23                    | H3K27ac; H3K27M3; H3K9M3                              | TCF7; CEBP;                           | GATA1; GR- $\alpha/\beta$ | TCF3; Y-box binding factor | NA                               |
|                | rs1173756      | 32789852                | 3'-UTR               | 0.78/1.00/0.58                    | H3K9M3; H3K4M1; H3K27ac; H3K27M3; EZH2                | SOX9; CTCF;                           | NA                        | NA                         | NA                               |
|                | rs7733331      | 32828846                | intergenic           | 1.00/0.96/0.44                    | EZH2; H3K9M3; H3K27M3; Poly-comb-repressed            | ETS1; FOXA; FOXB1; FOXC/D2; AR; NR3C1 | NA                        | NA                         | Trans-ancestry GWAS <sup>4</sup> |
| <b>Block 2</b> | rs1421811      | 32714270                | Lead SNP /intronic   | -                                 | EZH2; Poly-comb-repressed                             | SETDB1; BDP1_disc3; NRF1;             | -                         | -                          | Gene-centric <sup>3</sup>        |
|                | rs3762988      | 32709653                | intronic             | 0.84/0.92/0.26                    | H3K27M3; Weak enhancer                                | HNF1_3;                               | -                         | -                          | NA                               |
|                | rs3828591      | 32713108                | intronic             | 1.00/1.00/0.31                    | EZH2; CTCF H3K27M3; H3K4M2 H3K4M3 Poly-comb-repressed | ESRRA;                                | -                         | -                          | NA                               |

Note: NA, Not Available

**Supplementary Table 3. Part 1 of summary of primers used in this study.**

|                   | <b>Forward primer sequence (5'-3')</b>             | <b>Reverse primer sequence (5'-3')</b> |
|-------------------|----------------------------------------------------|----------------------------------------|
| <b>Genotyping</b> |                                                    |                                        |
| rs1173747-A       | GAAGGTGACCAAGTTCATGCTCCCTCAGTTTCTGGTTAAAATGATTGTTT | GACTGGGGCTTAGGGAGCTGAT                 |
| rs1173747-C       | GAAGGTCGGAGTCAACGGATTCCTCAGTTTCTGGTTAAAATGATTGTTG  | GACTGGGGCTTAGGGAGCTGAT                 |
| rs1173756_C       | GAAGGTCGGAGTCAACGGATTATCTATGCAATGGCCTTCATCTCG      | GCATCACTTTCCTTTTAGTTATGGCTGAT          |
| rs1173756_T       | GAAGGTGACCAAGTTCATGCTGATCTATGCAATGGACTTCATCTAA     | GCATCACTTTCCTTTTAGTTATGGCTGAT          |
| rs1173771_C       | GAAGGTGACCAAGTTCATGCTGGCTGCTGGTGCTTTGTGAATAAA      | AGCCAACCATATGATGATCTCATAACAA           |
| rs1173771_T       | GAAGGTCGGAGTCAACGGATTGCTGCTGGTGCTGCTTTGTGAATAAG    | AGCCAACCATATGATGATCTCATAACAA           |
| rs1421811_G       | GAAGGTGACCAAGTTCATGCTAAGTCAGAGACTTCCCAGGCC         | CAAACCGCGGATCTCGCCATA                  |
| rs1421811_C       | GAAGGTCGGAGTCAACGGATTAAGTCAGAGACTTCCAAGGCG         | CAAACCGCGGATCTCGCCATA                  |
| rs3828591_G       | GAAGGTGACCAAGTTCATGCTGAGCTAAGTGGCGACGCCTG          | GAAGCGTCCGCGGACGCCT                    |
| rs3828591_C       | GAAGGTCGGAGTCAACGGATTGAGCTAAGTGGCGACGCCTC          | GAAGCGTCCGCGGACGCCT                    |
| rs3762988_C       | GAAGGTCGGAGTCAACGGATTAACCAGGAGCAAAGAGACATCT        | GTGTGGATTACCCTGTTTGTGGAATTA            |
| rs3762988_T       | GAAGGTGACCAAGTTCATGCTAACCAGGAGCAAAGAGACATCT        | GTGTGGATTACCCTGTTTGTGGAATTA            |
| <b>EMSA</b>       |                                                    |                                        |
| rs1173771-C*      | CTCATACC AACTTATTCACAA                             | TTGTGAATAAGTTGGTATGAG                  |
| rs1173771-T*      | CTCATACC AATTTATTCACAA                             | TTGTGAATAAATTGGTATGAG                  |
| rs1173747-A*      | GGAGCTGATCAAACAATCATT                              | AATGATTGTTTGGATCAGCTCC                 |
| rs1173747-C*      | GGAGCTGATCCAACAATCATT                              | AATGATTGTTGGATCAGCTCC'                 |

Note: \* EMSA oligos were 5'-biotin labeled.

**Supplementary Table 3. Part 2 of summary of primers used in this study.**

|                 | <b>Forward primer sequence (5'-3')</b> | <b>Reverse primer sequence (5'-3')</b> | <b>Product size</b> |
|-----------------|----------------------------------------|----------------------------------------|---------------------|
| q RT-PCR        |                                        |                                        |                     |
| 18S             | CCCAGTAAGTGCGGGTCATAA                  | CCGAGGGCCTCACTAAACC                    | 155bp               |
| NPR3            | GCCGCATTTCAAACGACCT                    | TGCCAACGGAGACCGATATG                   | 130bp               |
| AEI             |                                        |                                        |                     |
| rs1173756_g DNA | TTGGAATGCCCTCACTTCTC                   | GTGACGCCACTGGAACCTAC                   | 220bp               |
| rs1173756_c DNA | TGCTTTGGAATGCCCTCACT                   | ACGCCACTGGAACCTACTTT                   | 221bp               |
| FAIRE and ChIP  |                                        |                                        |                     |
| rs1173771       | AGTTGAGAGTTGGATGGGGA                   | GCTAACGTATGCTTGACCAA                   | 165bp               |
| rs1173747       | TGTCAGGAGAAGGGGAGATGT                  | TTCCATGGTCATCCCTCAGTT                  | 167bp               |
| Cloning         |                                        |                                        |                     |
| rs1173771       | CACCACGAGCTCCCCATGATTCAATTACGTCCCC     | GTCCACACGCGTACGTATGCTTGACCAAACACA      | 152bp               |
| rs1173747       | CACCACGAGCTCTTCCAAGAACCTGGGTGGGA       | CGTCCACACGCGTTCTGGCCCCTGGAAATCATT      | 216bp               |

**Supplementary Table 4. Buffers' composition utilized in ChIP.**

---

| <b>Buffers</b>        | <b>Composition</b>                                                                                                |
|-----------------------|-------------------------------------------------------------------------------------------------------------------|
| Lysis buffer          | 50mmol/L Tris-HCl pH 8.0, 10mmol/L EDTA, 150mmol/L NaCl, 1% w/v sodium dodecylsulfate                             |
| ChIP dilution buffer  | 16.7 mmol/L Tris pH 8.0, 1.2 mmol/L EDTA, 150 mmol/L NaCl, 1.1% v/v Triton X-100, 0.01% w/v sodium dodecylsulfate |
| Low salt wash buffer  | 20mmol/L Tris-HCl pH 8.0, 2mmol/L EDTA, 150mmol/L NaCl, 0.1% w/v sodium dodecylsulfate, 1% v/v Triton X-100       |
| High salt wash buffer | 20mmol/L Tris-HCl pH 8.0, 2mmol/L EDTA, 500mmol/L NaCl, 0.1% w/v sodium dodecylsulfate, 1% v/v Triton X-100       |
| LiCl wash buffer      | 250 mmol/L lithium chloride, 10mmol/L Tris-HCl pH 8.0, 1mmol/L EDTA, 1% v/v NP-40, 1% w/v sodium dodecylcholate   |
| TE wash buffer        | 20mmol/L Tris-HCl pH 8.0, 1mmol/L EDTA                                                                            |
| Elution buffer        | 1% w/v sodium dodecylsulfate, 100 mmol/L NaHCO <sub>3</sub>                                                       |

---
